# Supplementary material
Source: Springer Nature journal article supplement (https://www.springermedizin.de/resource/supplementary/12879_2010_1427_MOESM4_ESM.pdf/9443234)

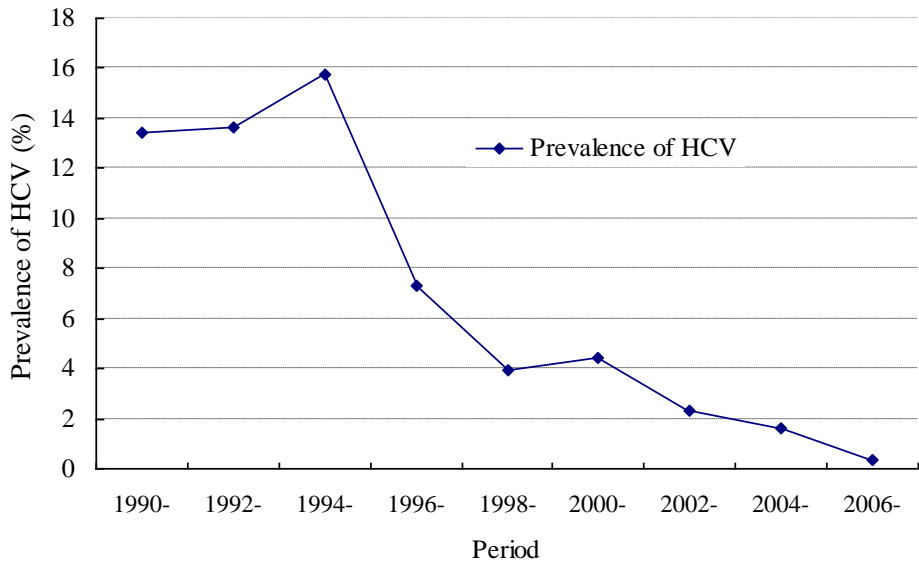

Supplement: MOESM4 [file 9443234]
